# Supplementary material
Source: PubMed Central journal article supplement (PMC8218238)

# Supplementary Figure S1

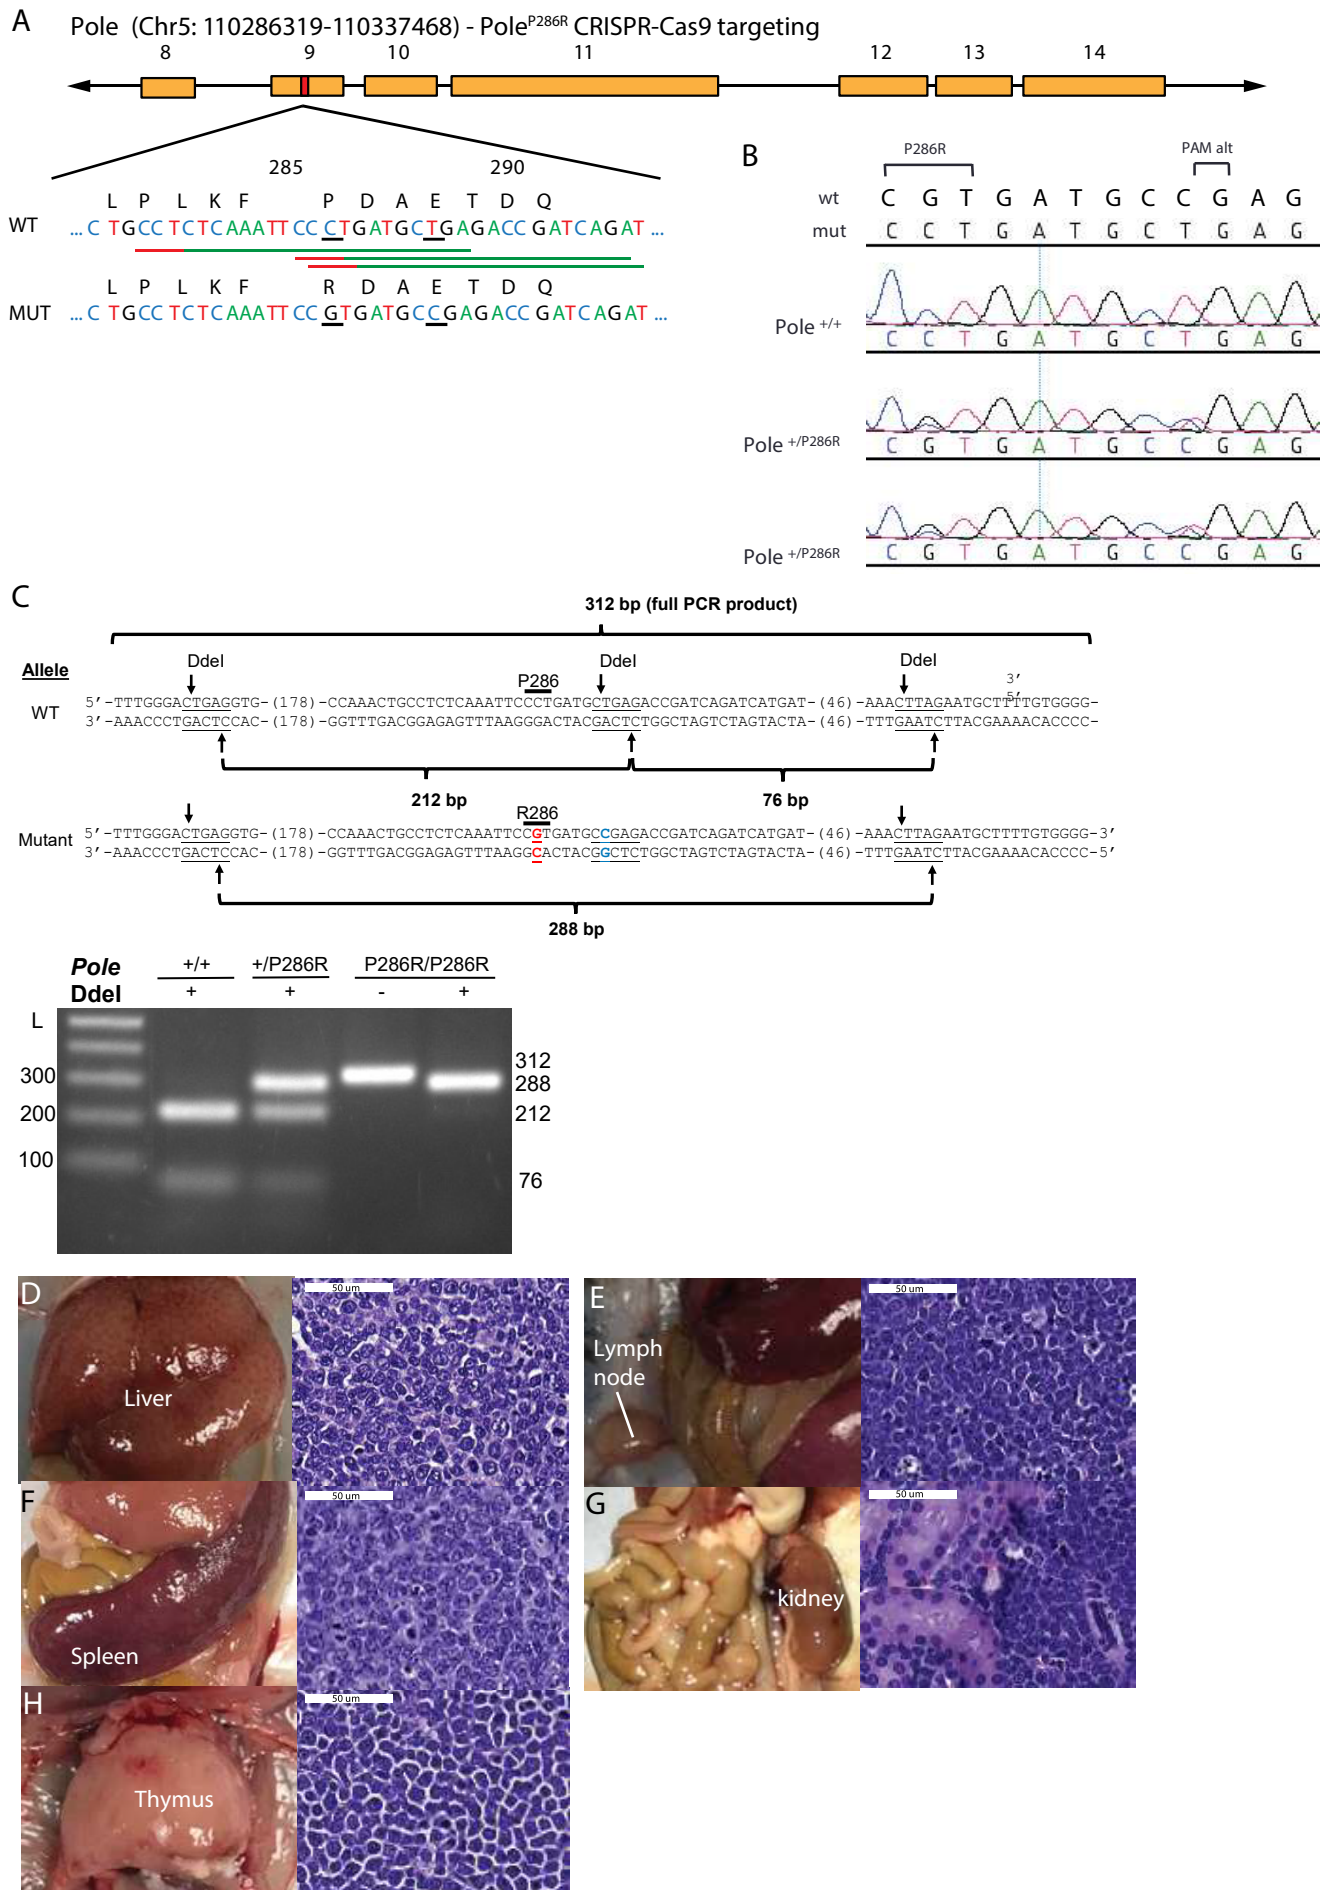

# Supplementary Figure S2

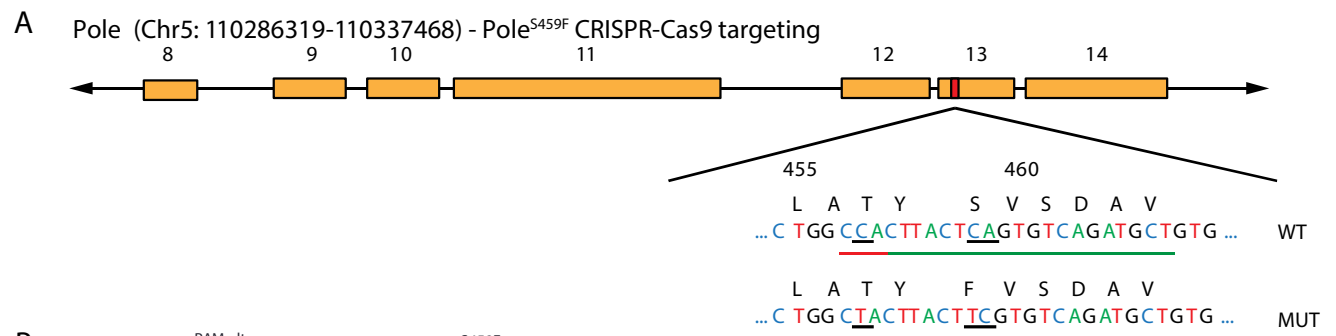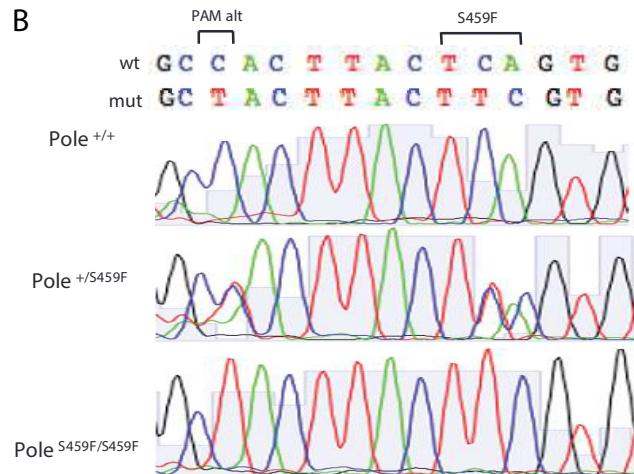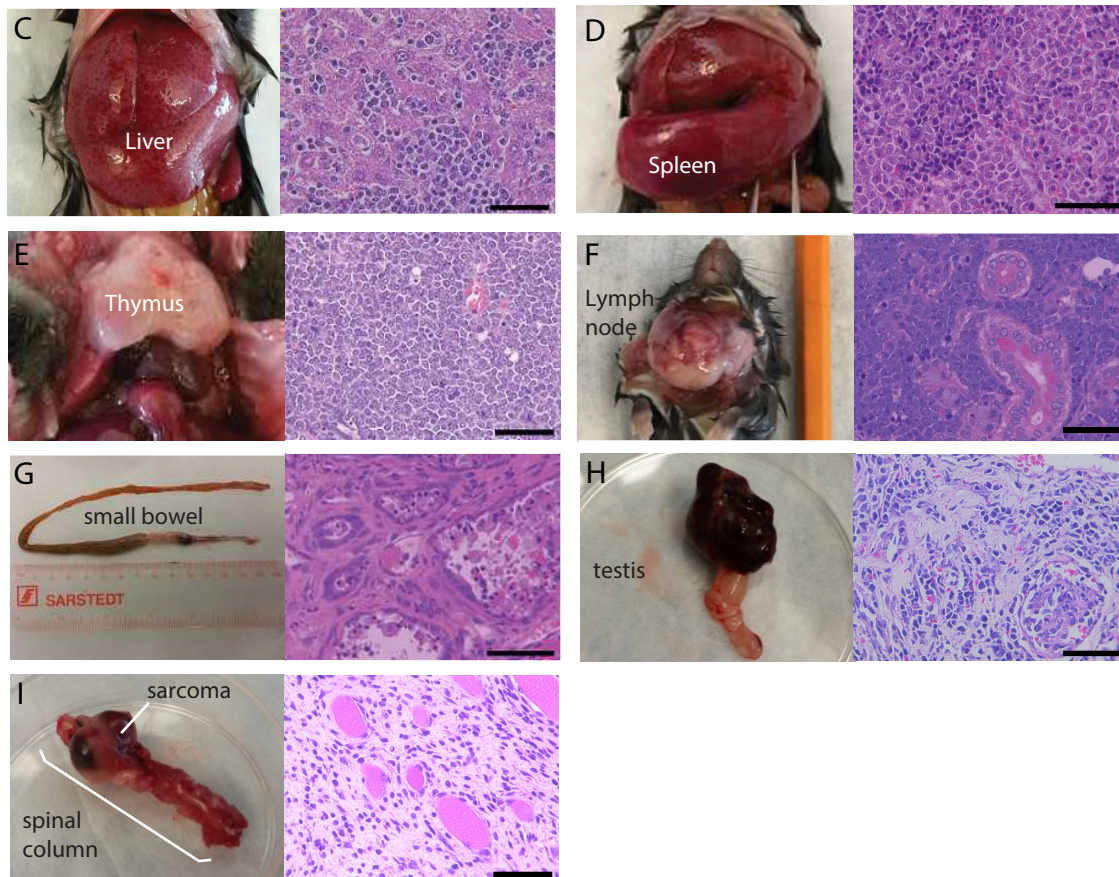

### Supplementary Figure 3

### S459F/S459F

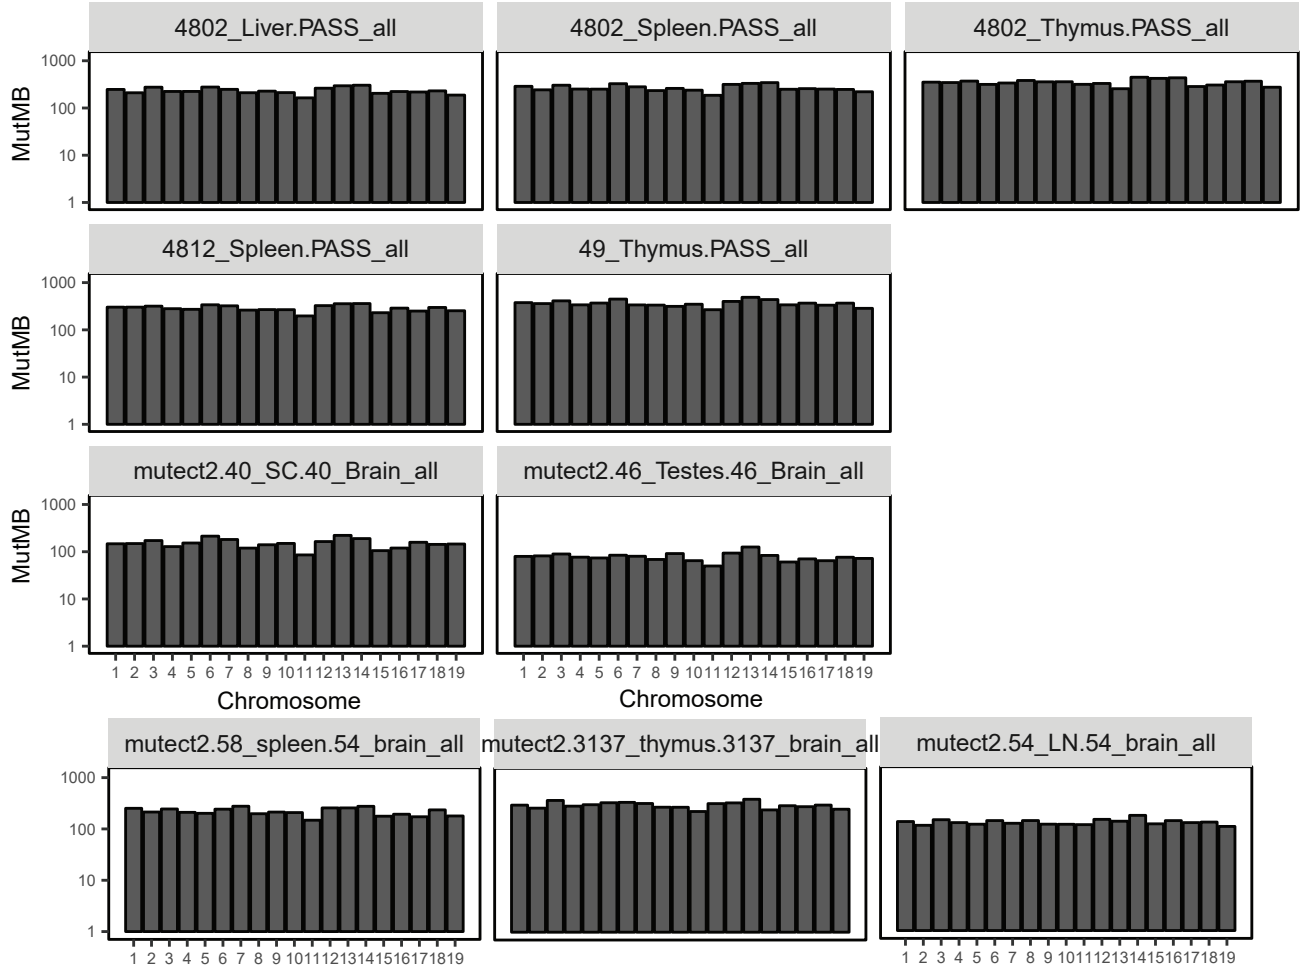

### S459F/+

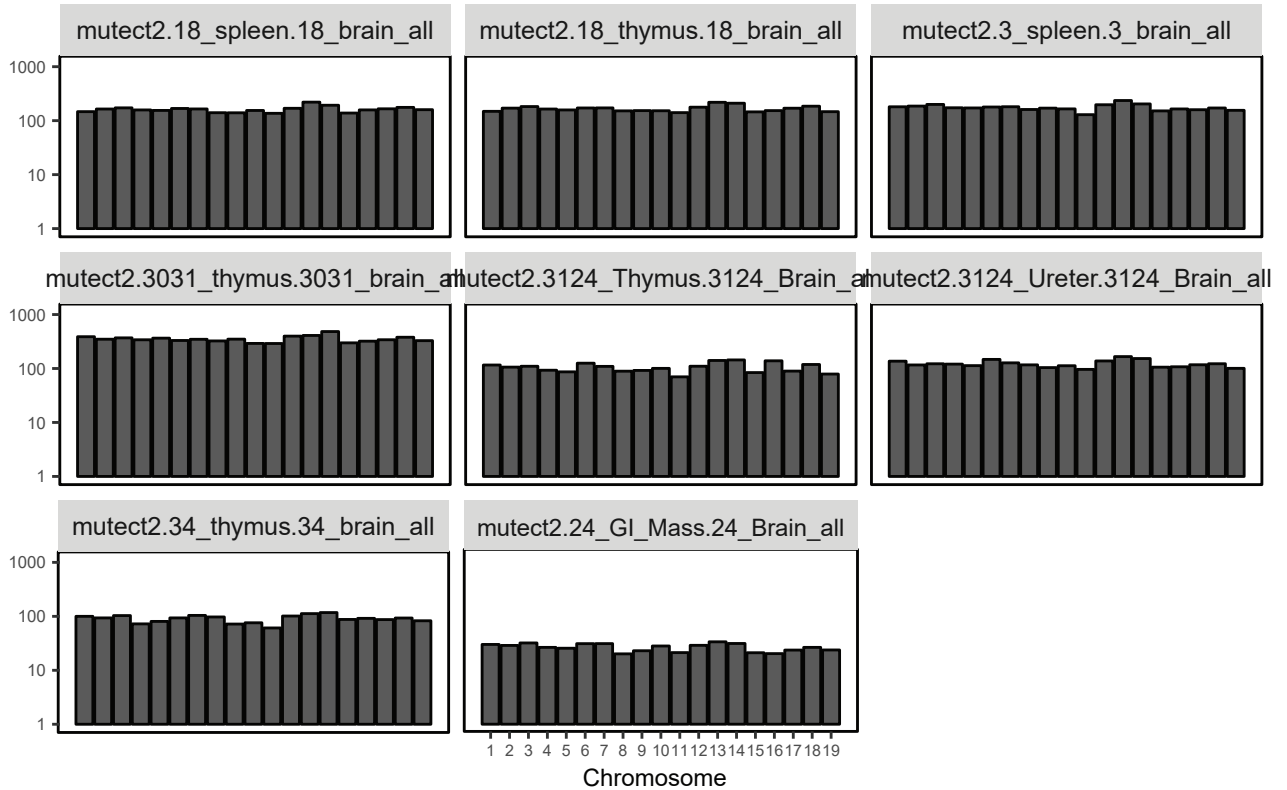



# Supplementary Figure 4

## Pole P286R/+ mouse tumours

### 21-GI Lymphoma

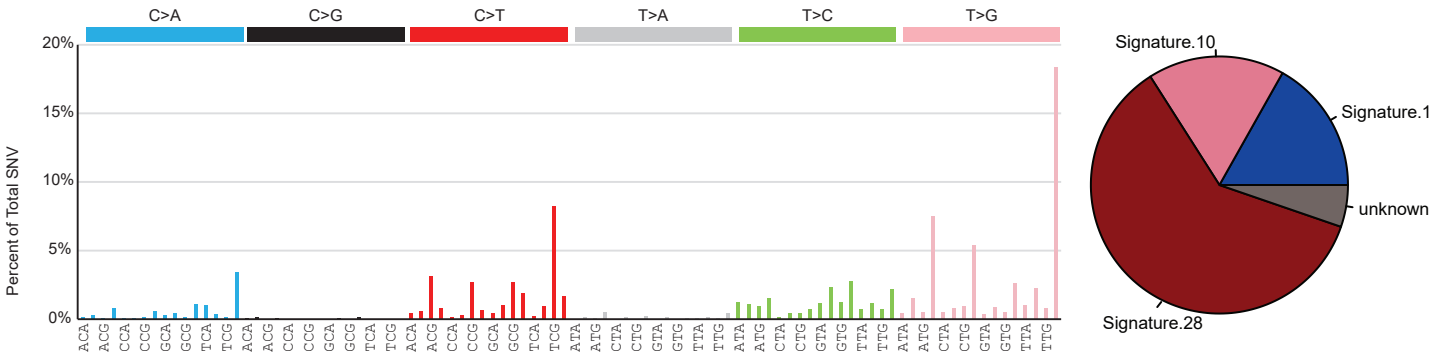

### 21-Spleen

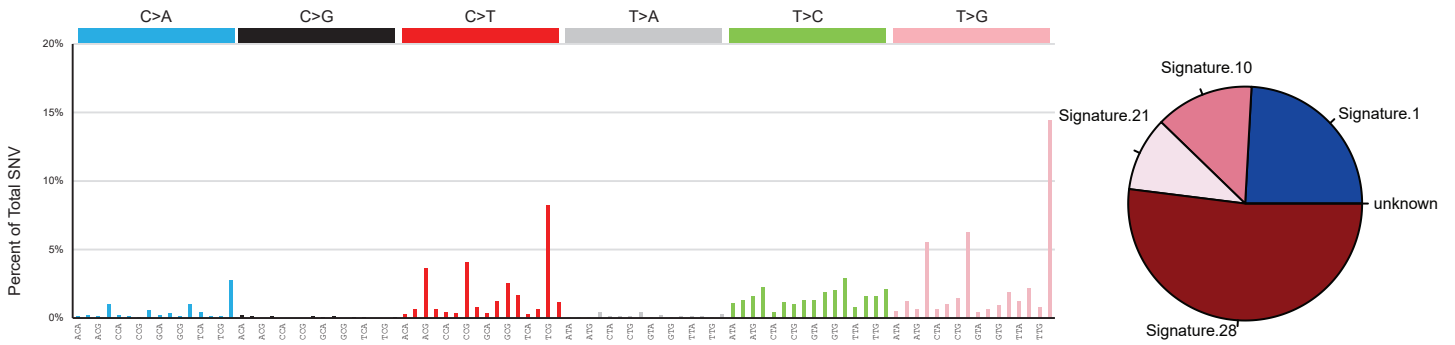

### 21-Thymus

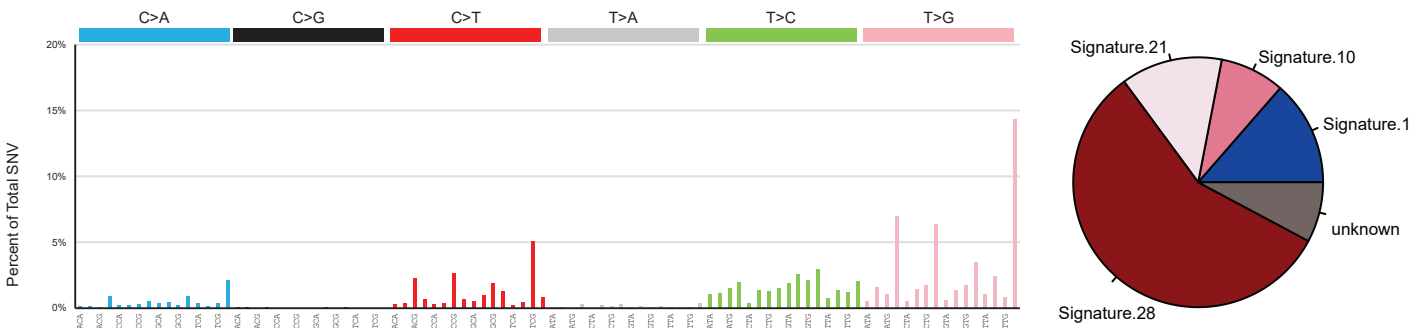

### 71-Pelvic Mass

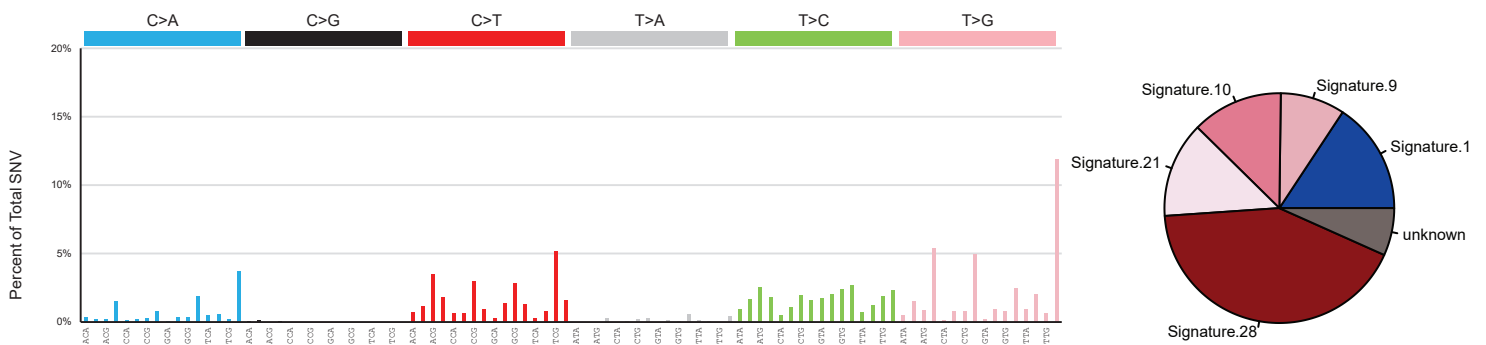

**Pole P286R/+ mouse tumours cont'd**

72-Thymus

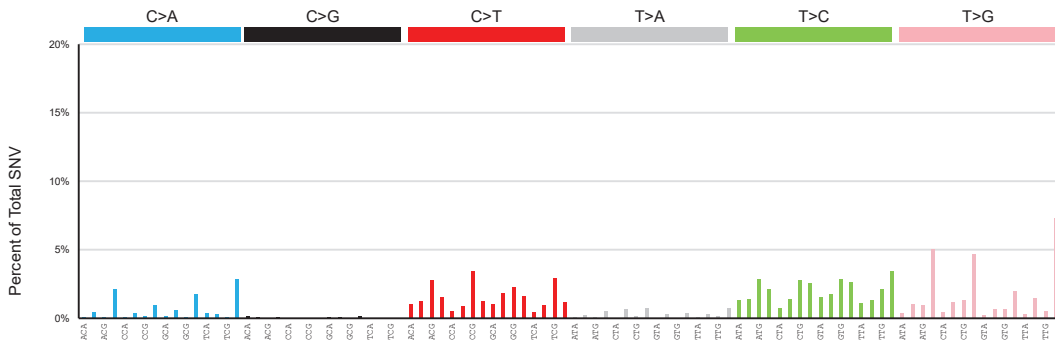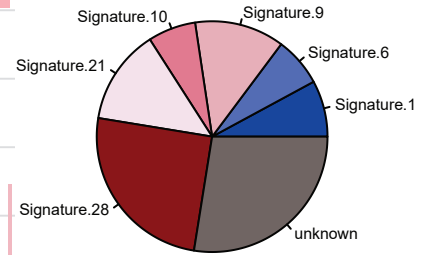

122-Thymus

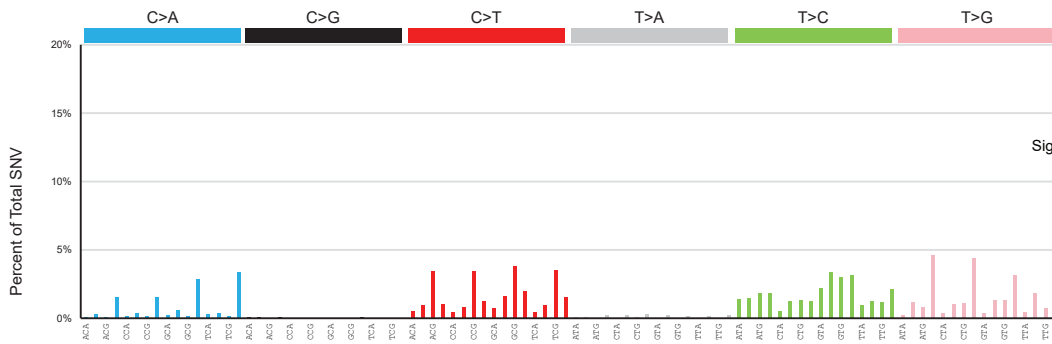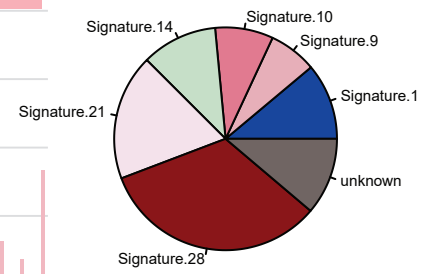

140-Armpit Mass

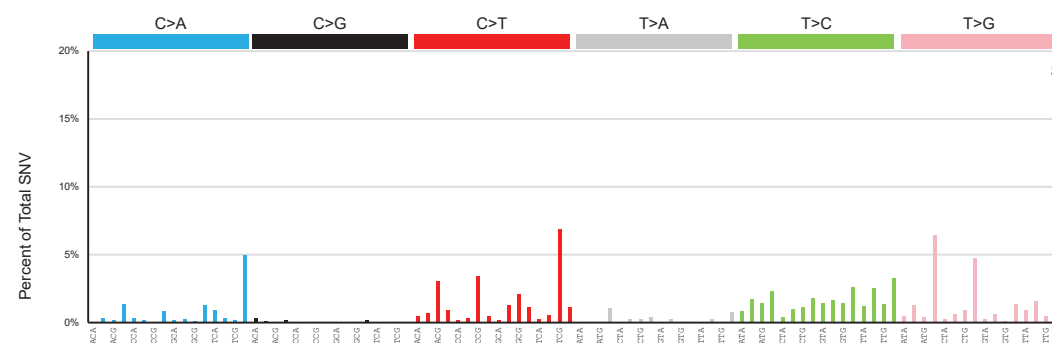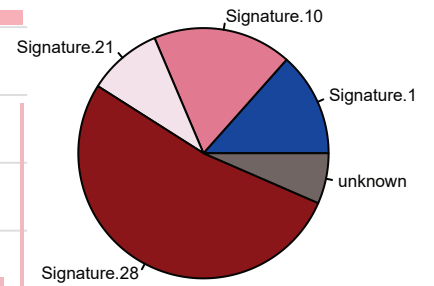

140-Liver

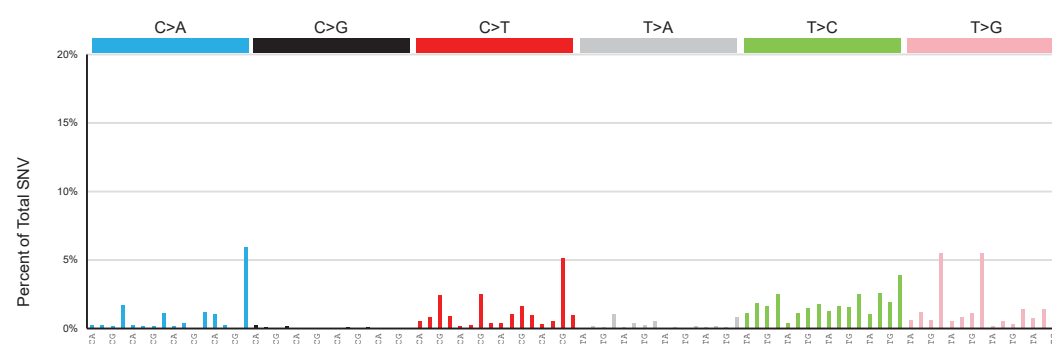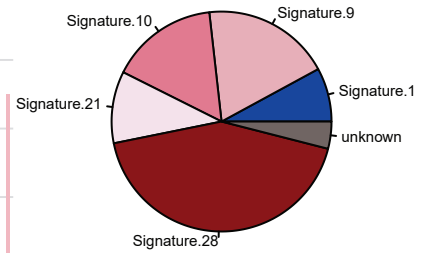

**Pole P286R/+ mouse tumours cont'd**

140-Spleen

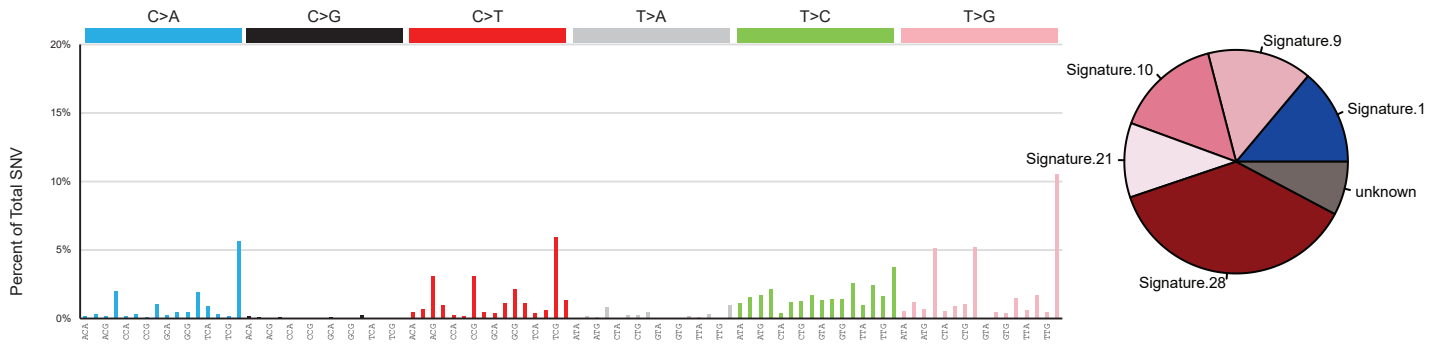

1144-Thymus

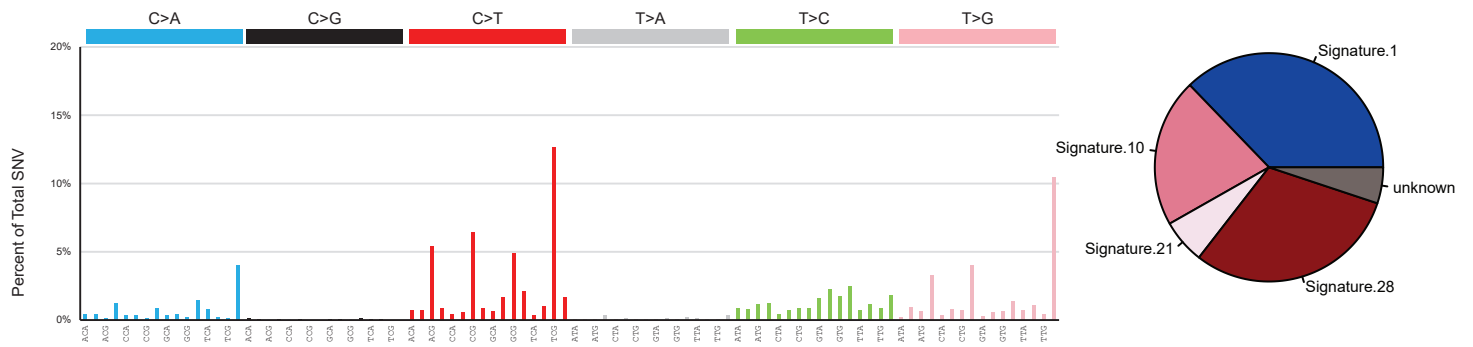

1098-Thymus

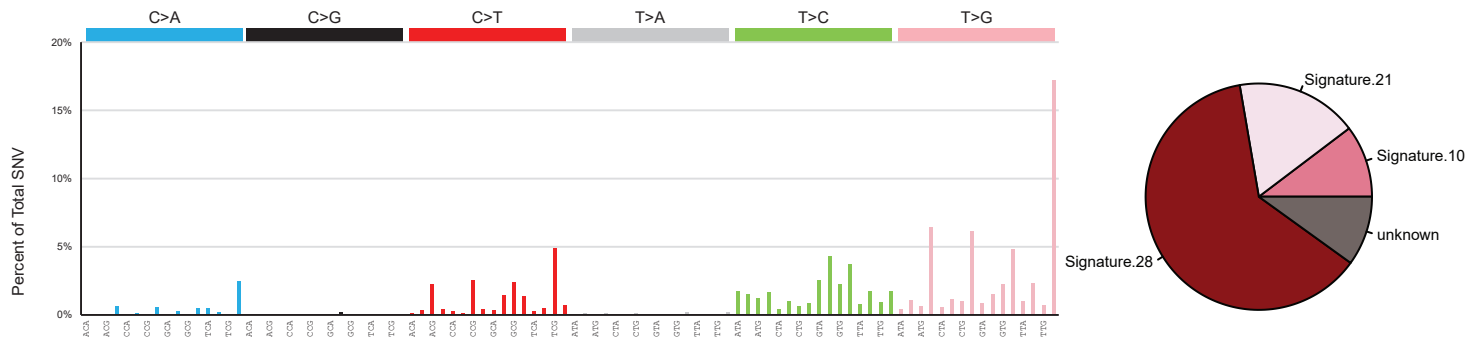

**Pole S459F/+ mouse tumours**

3-Spleen

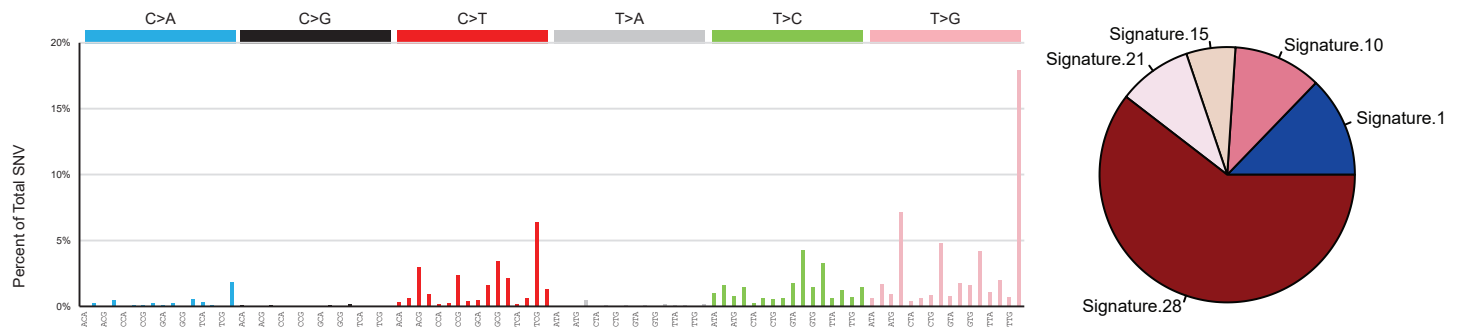

**Pole S459F/+ mouse tumours cont'd**

18-Spleen

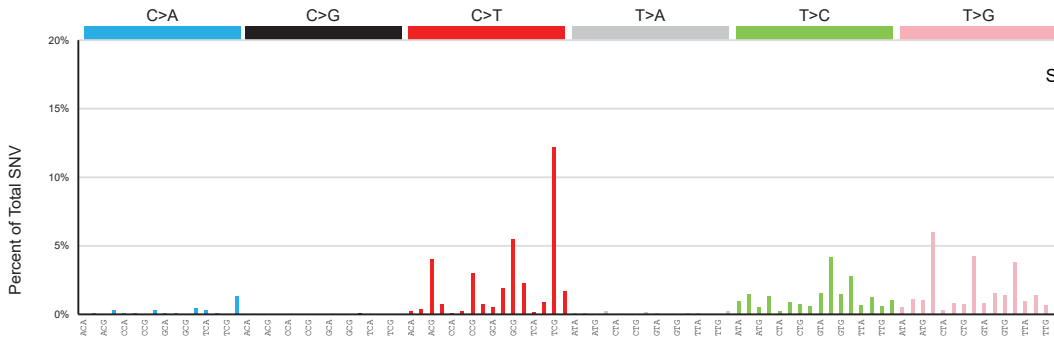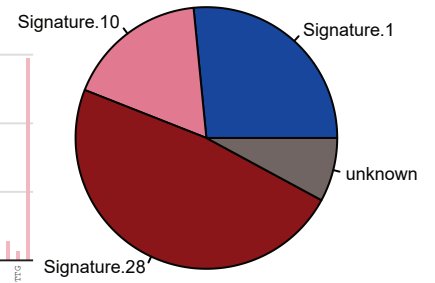

18-Thymus

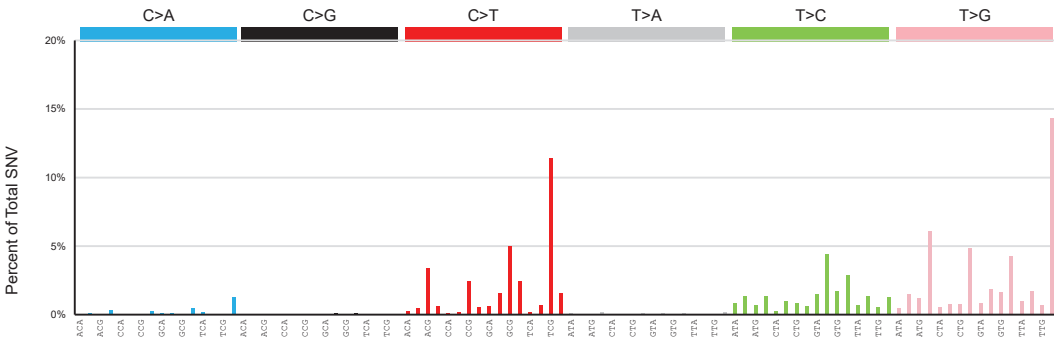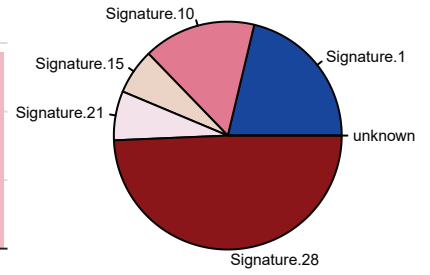

24-GI Mass

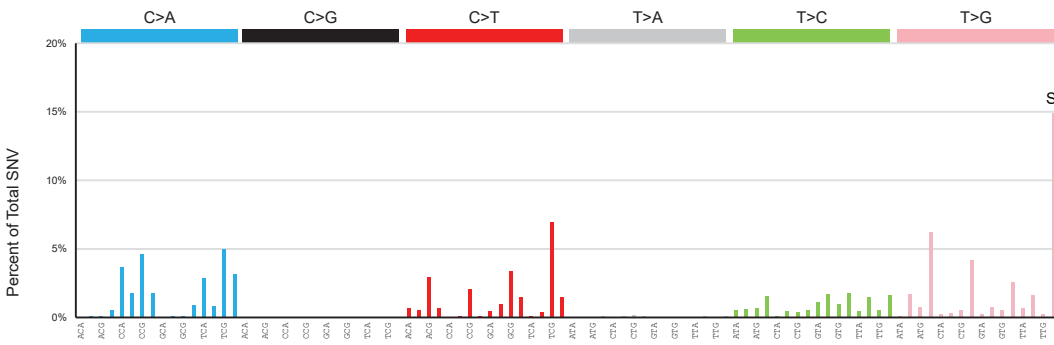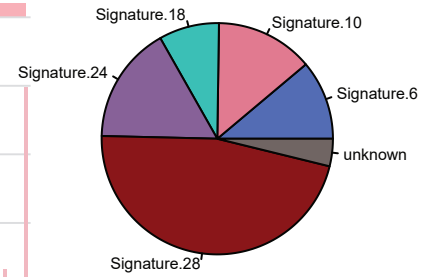

34-Thymus

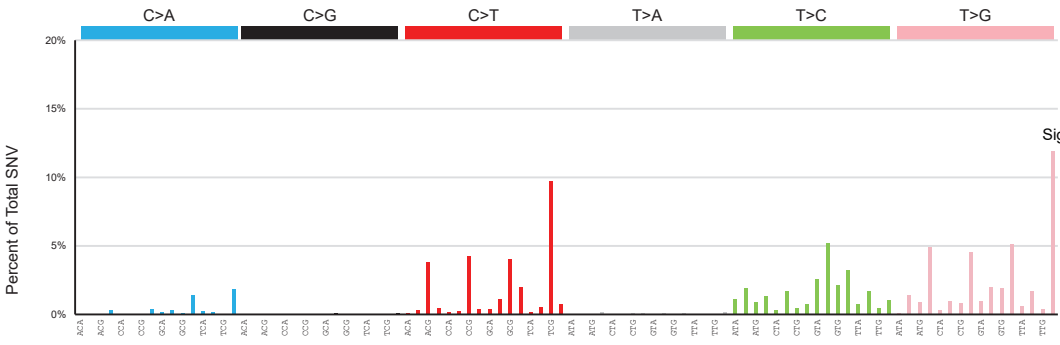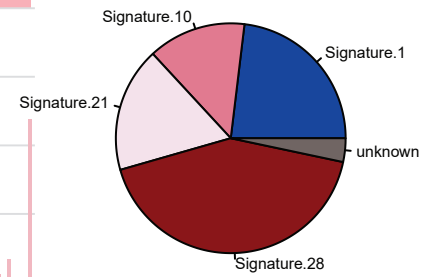



**Pole S459F/+ mouse tumours cont'd**

3031-Thymus

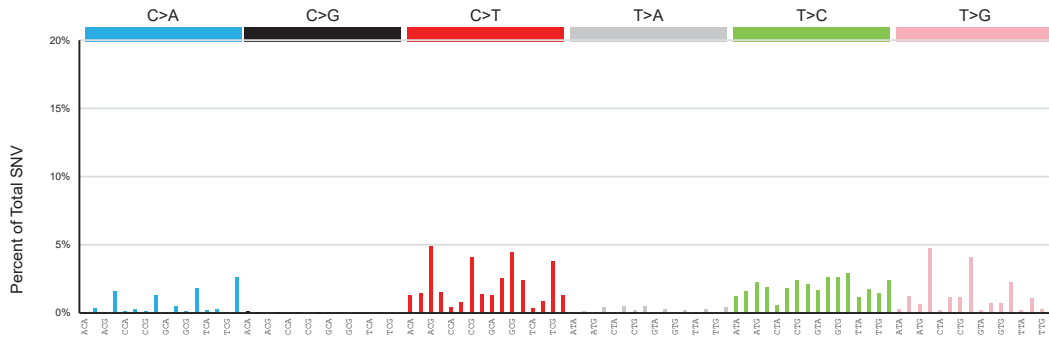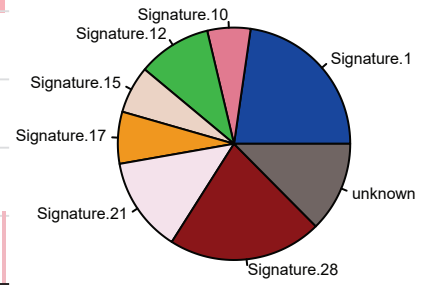

3124-Thymus

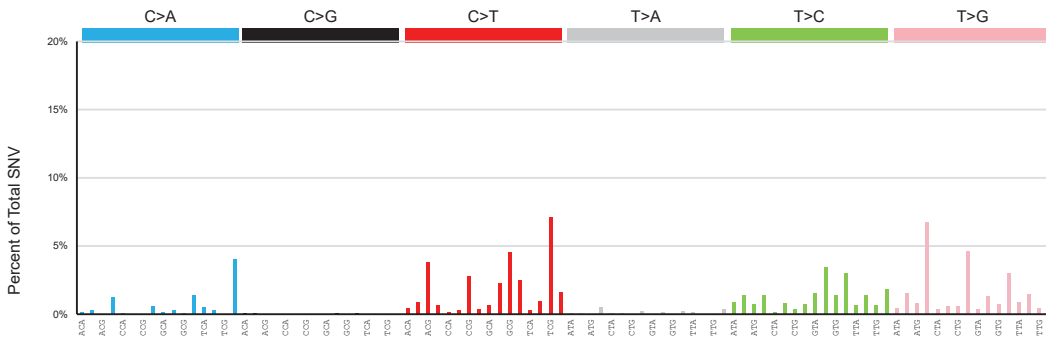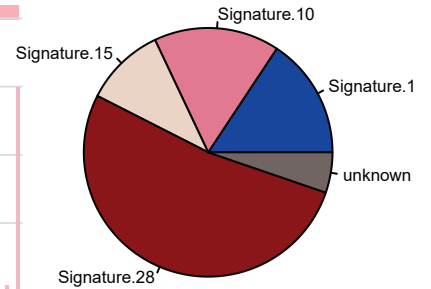

3124-Ureter

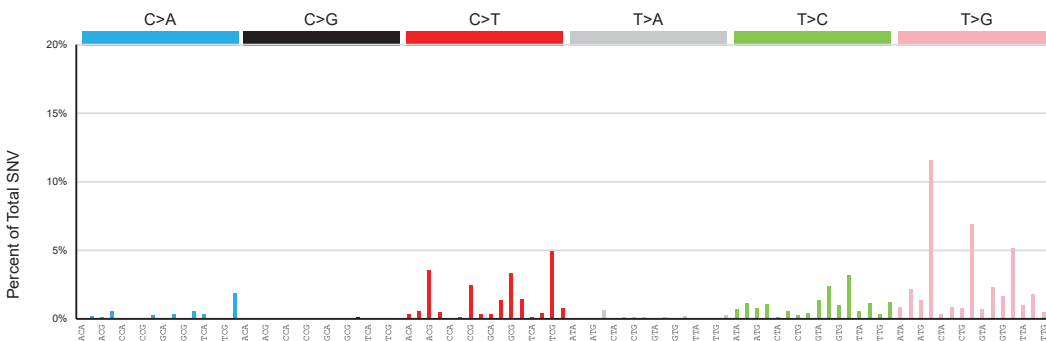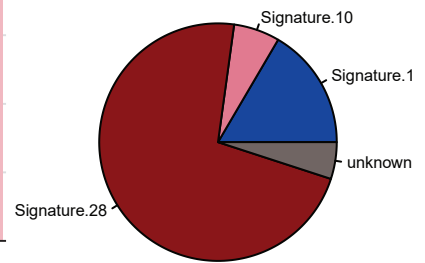

**Pole S459F/S459F mouse tumours**

46-Testes

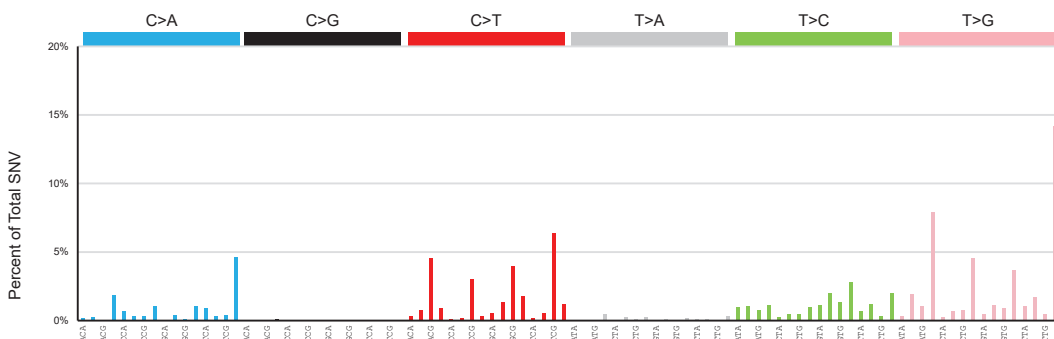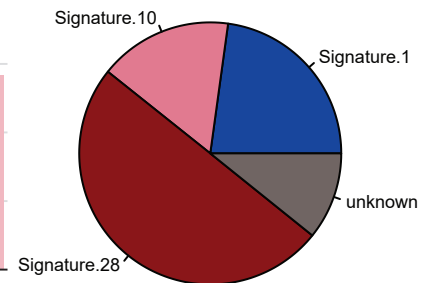

# Pole S459F/S459F mouse tumours cont'd

49-Thymus

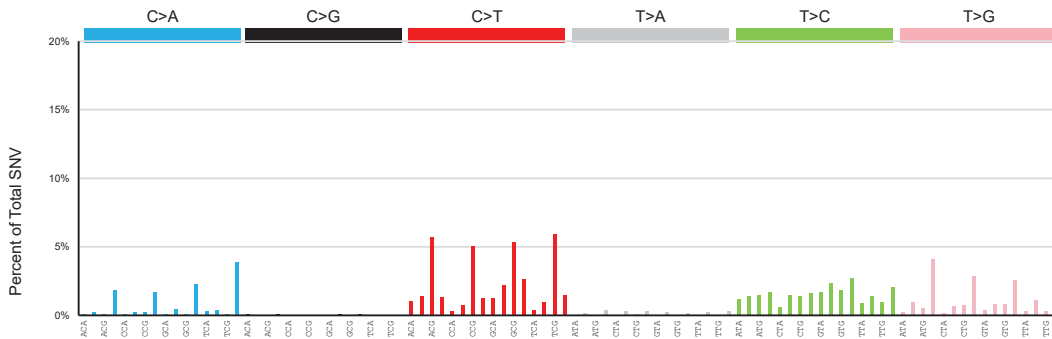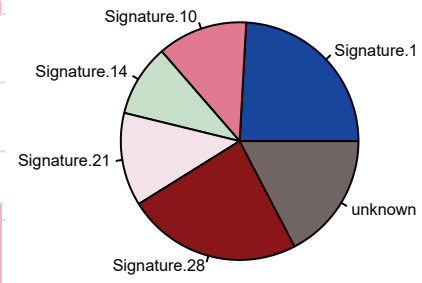

54-LN

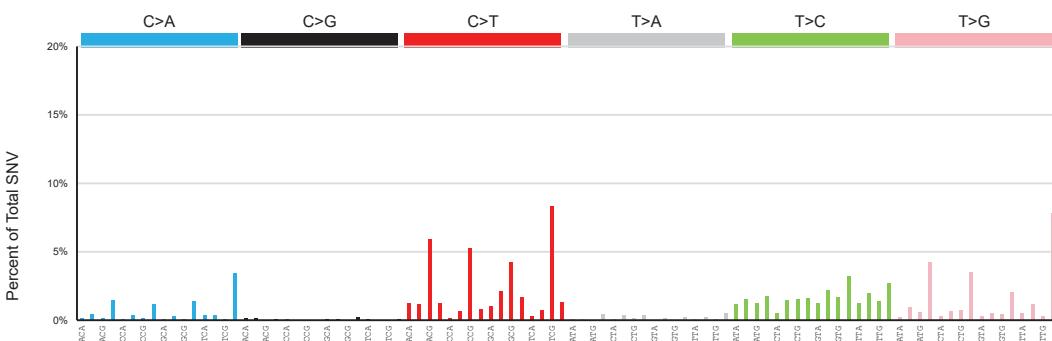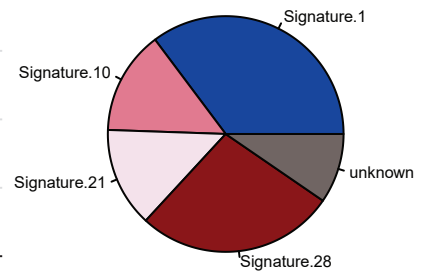

58-Spleen

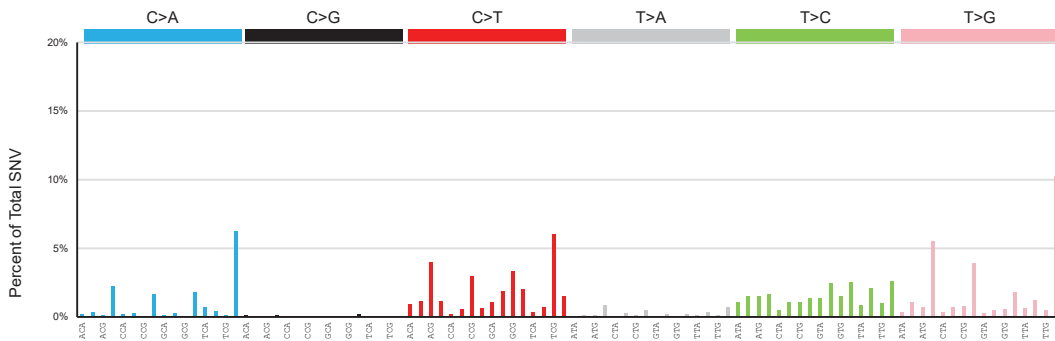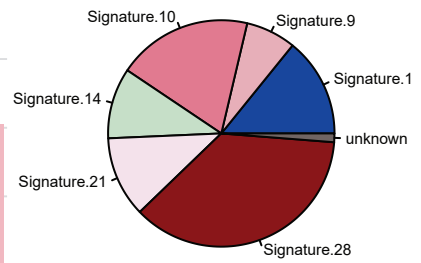

3137-Thymus

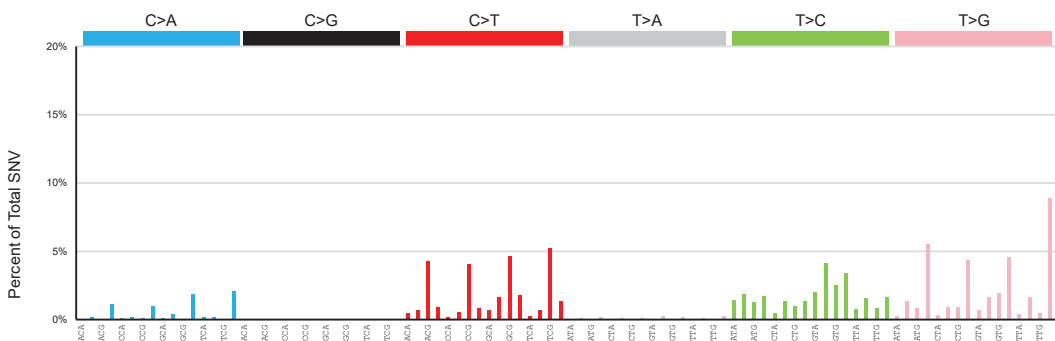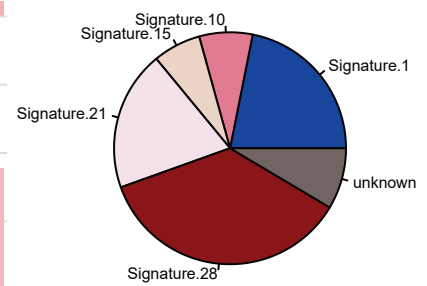

**Pole S459F/S459F mouse tumours cont'd**

4802-Liver

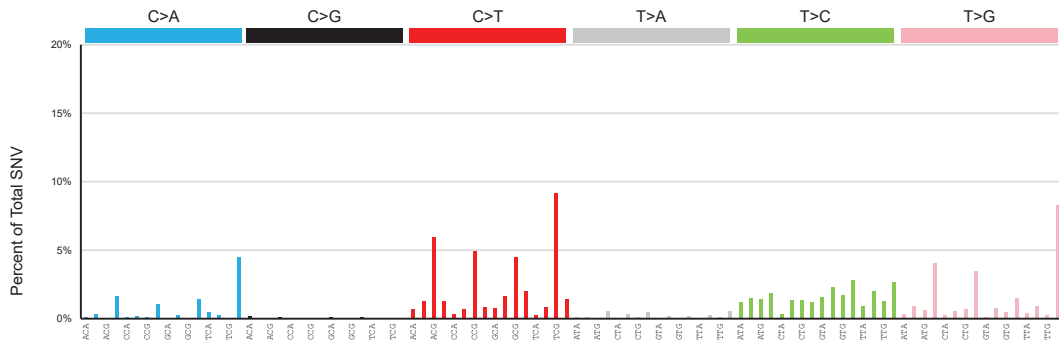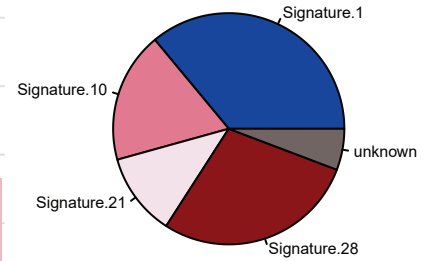

4802-Spleen

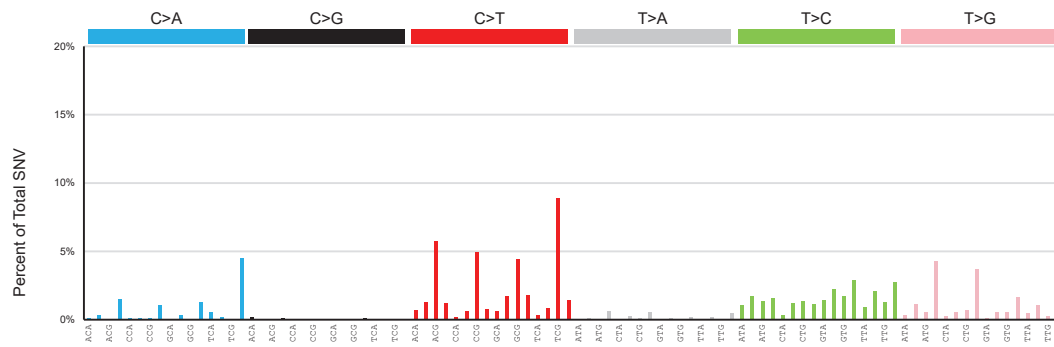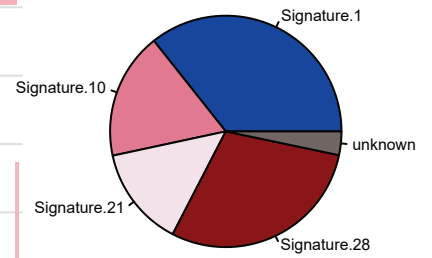

4802-Thymus

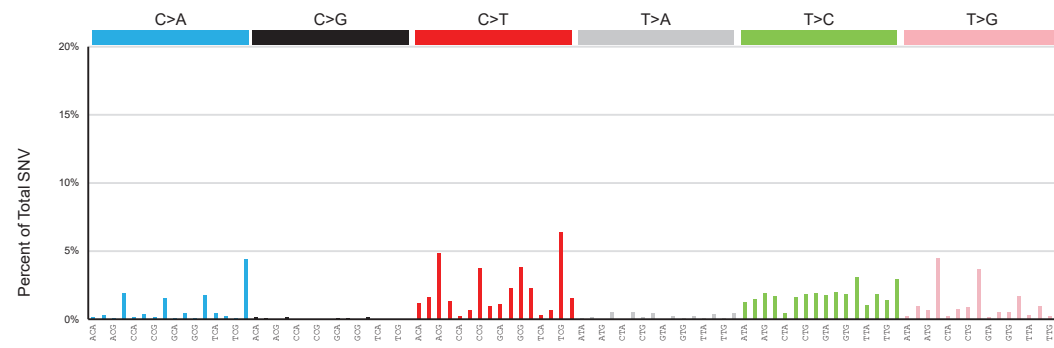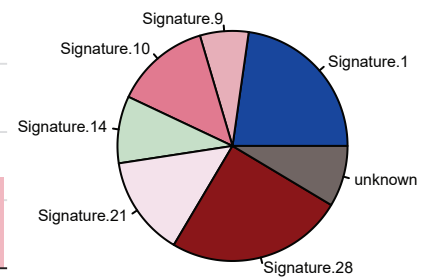

4812-Spleen

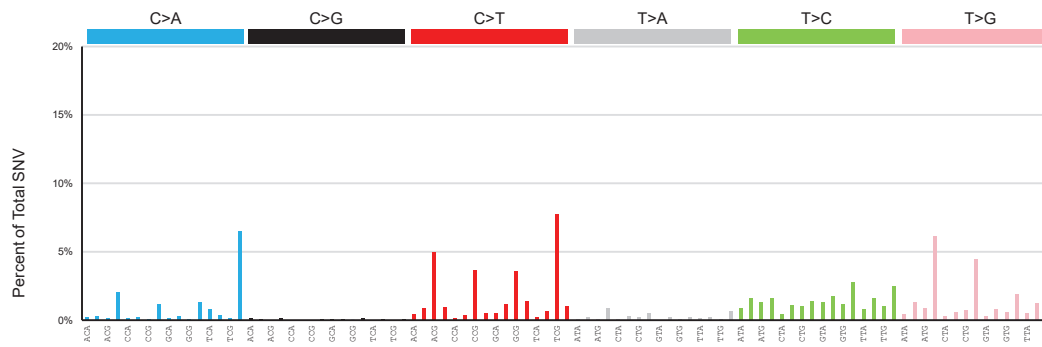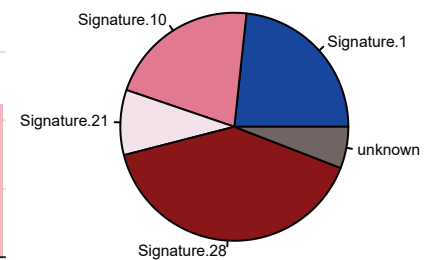

# Supplementary Figure 5

S459F Mouse 18

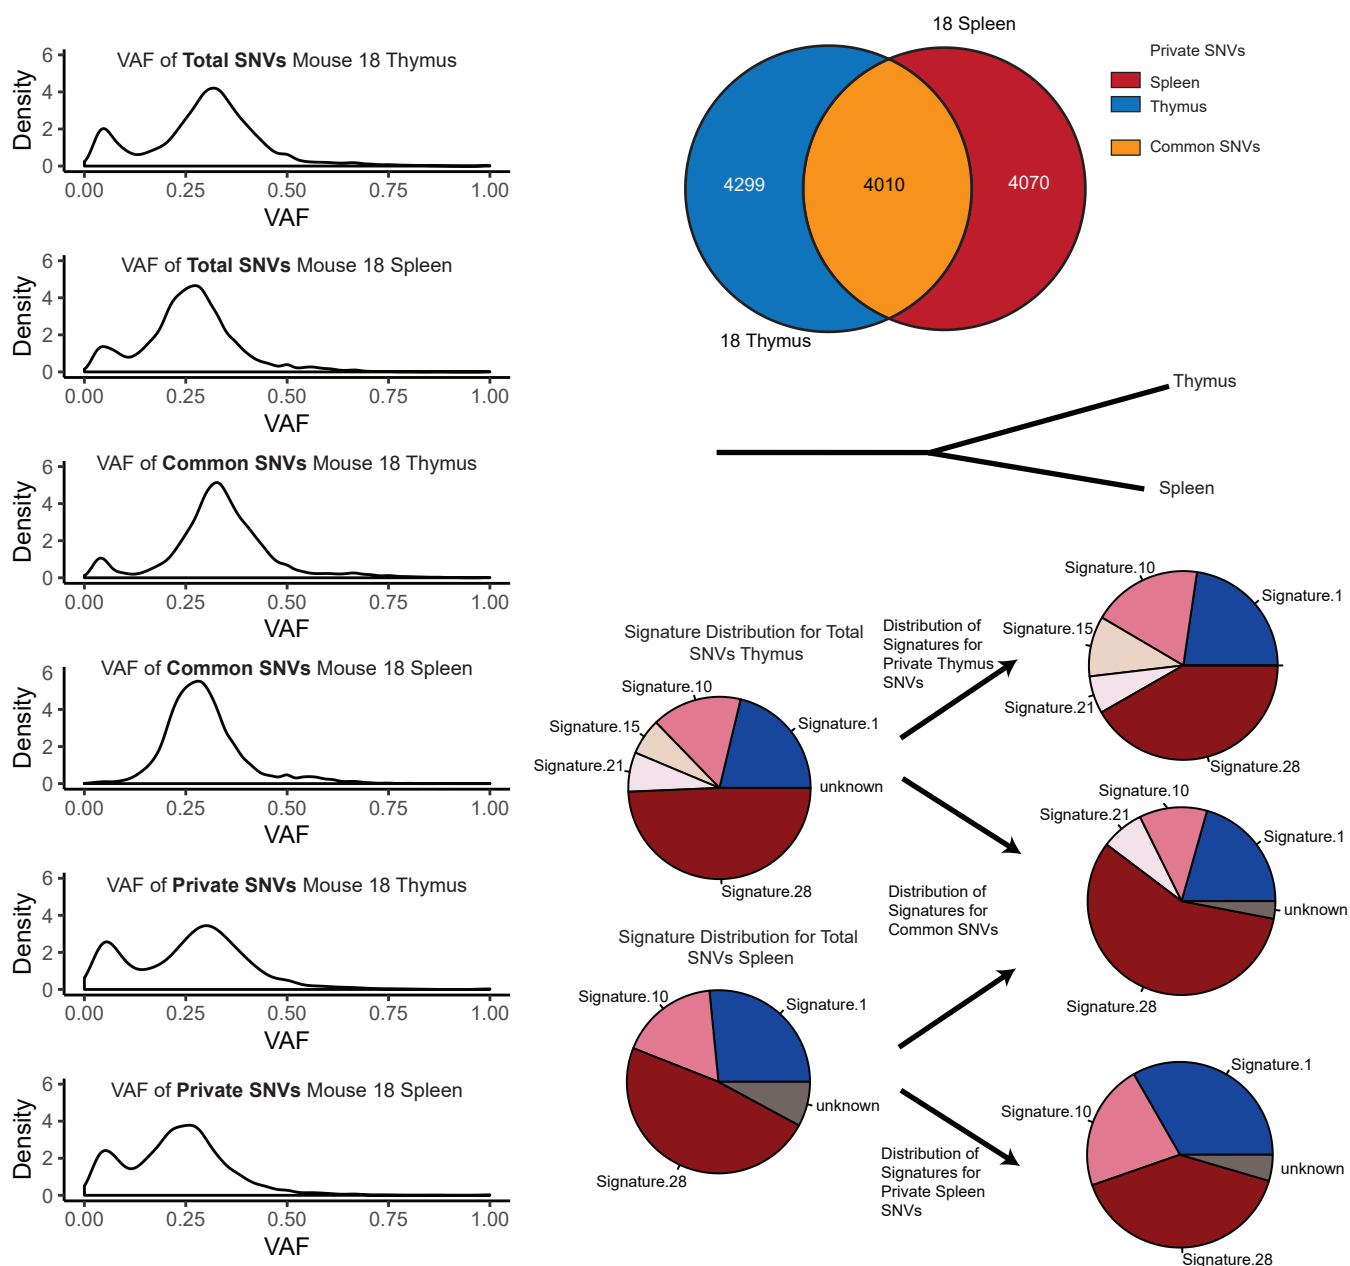

# P286R Mouse 21

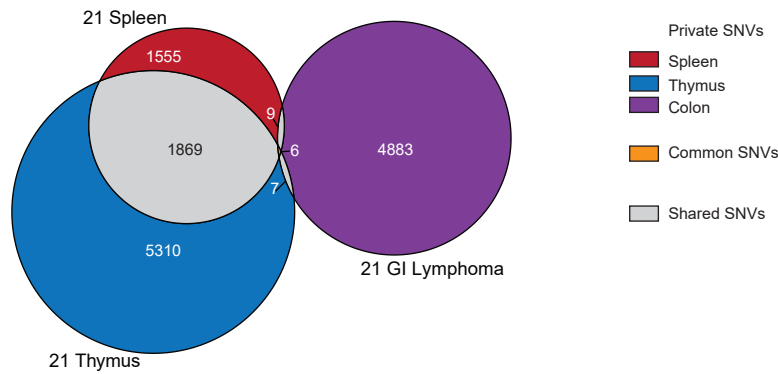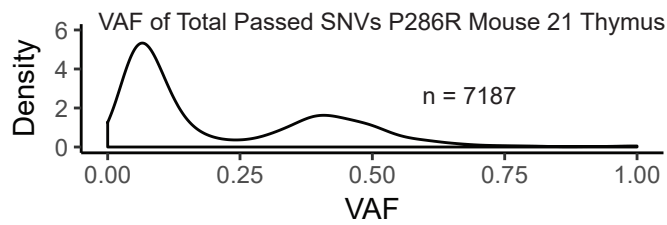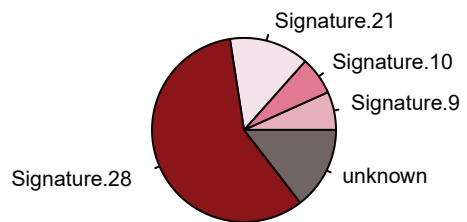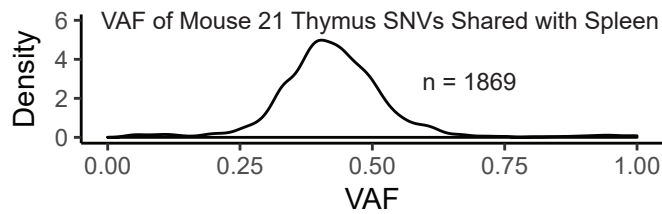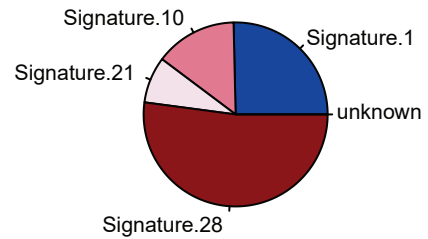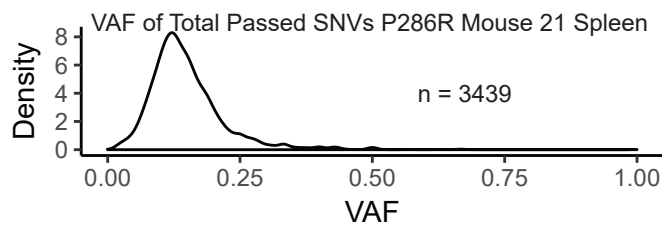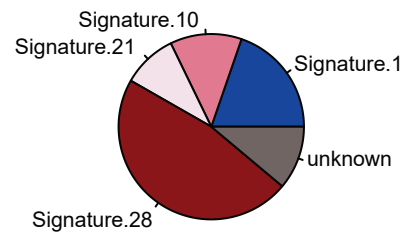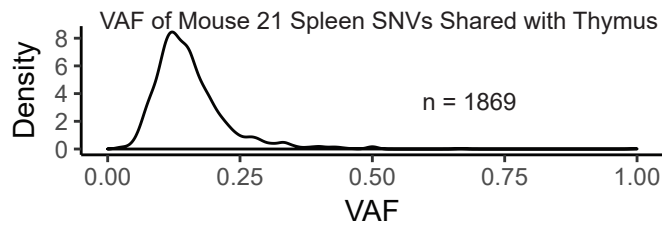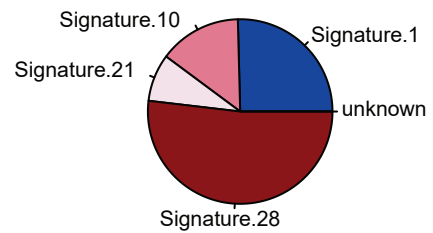

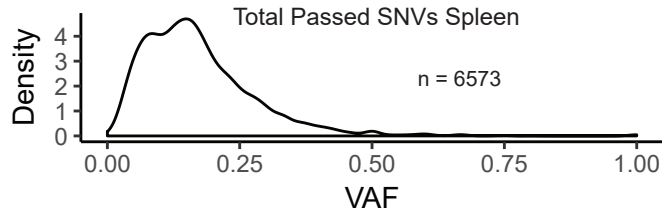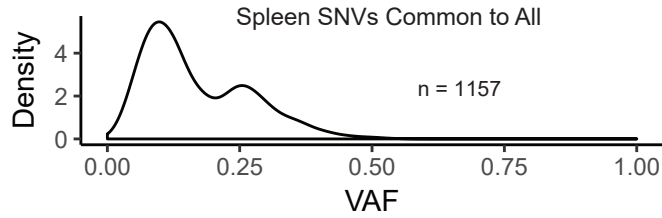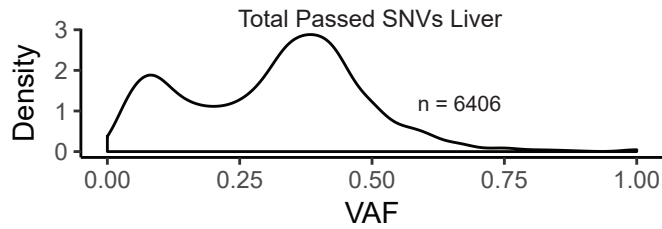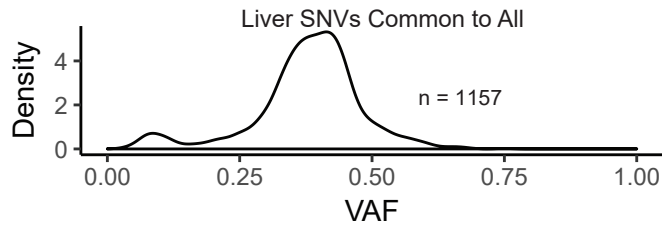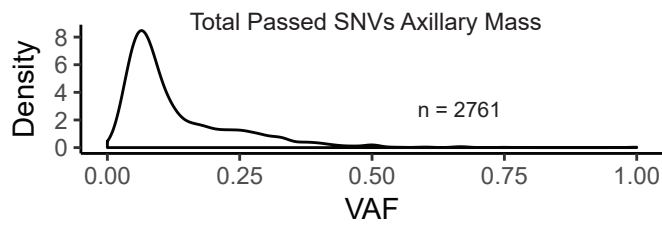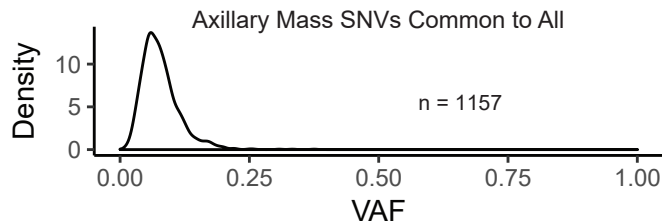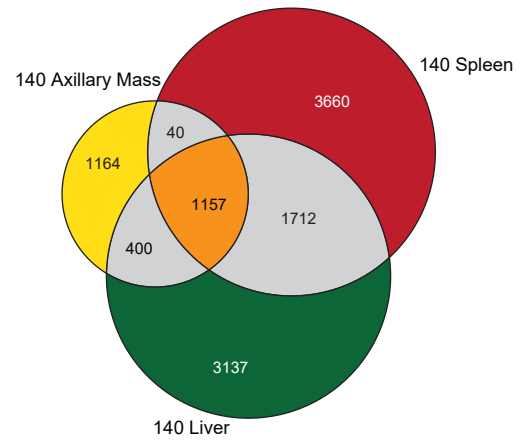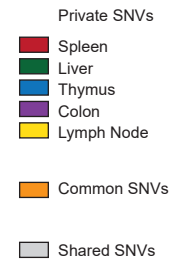

Supplementary Figure 6

**A**

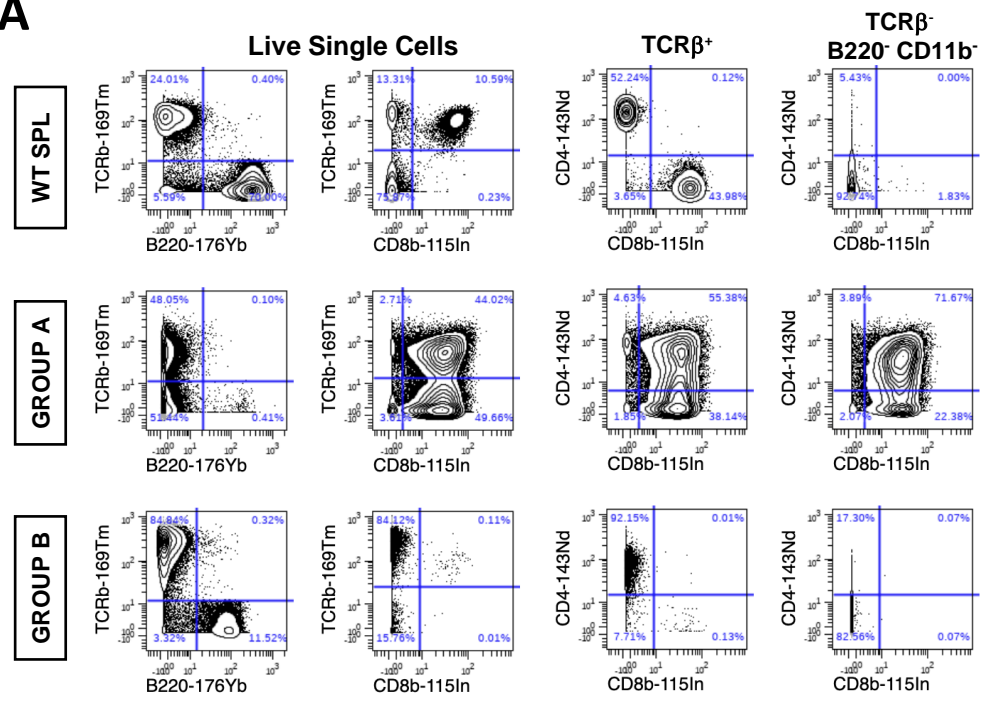

**B**

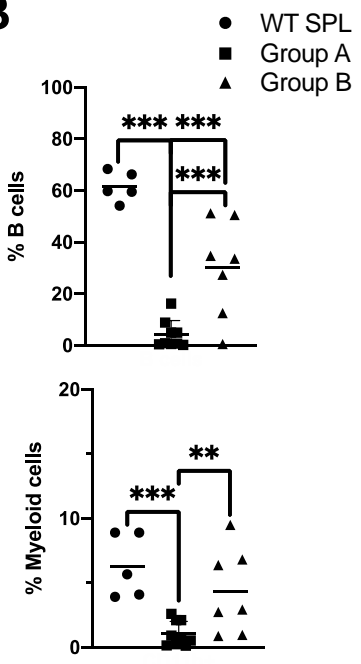

**C**

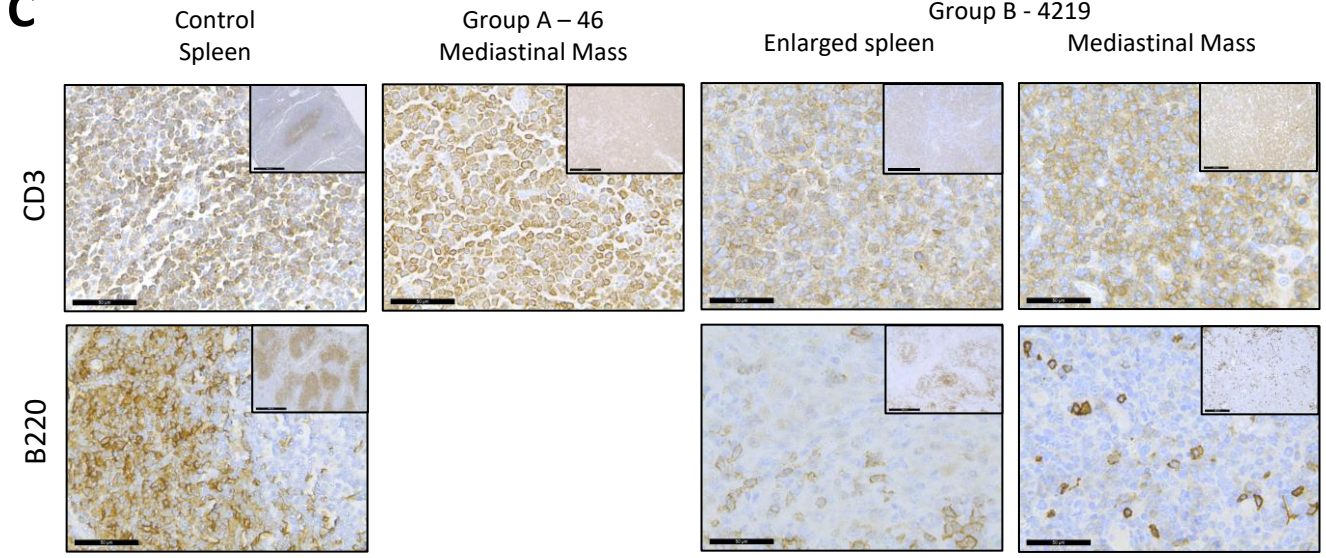

# Supplementary Figure 7

## A

### *Atm*<sup>-/-</sup> Thymic Lymphomas

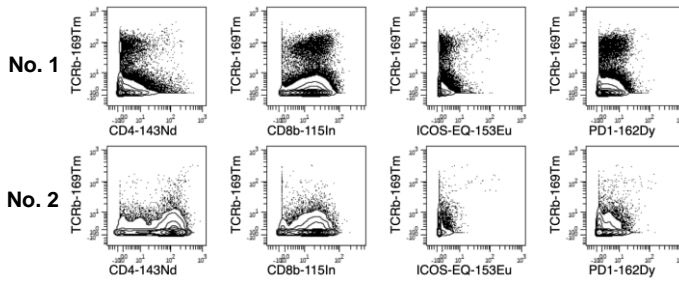

## B

### TCRβ<sup>+</sup>

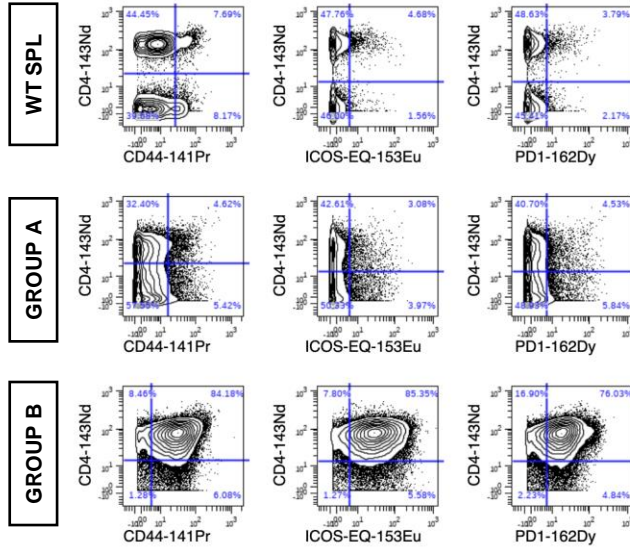

## C

### TCRβ<sup>+</sup>

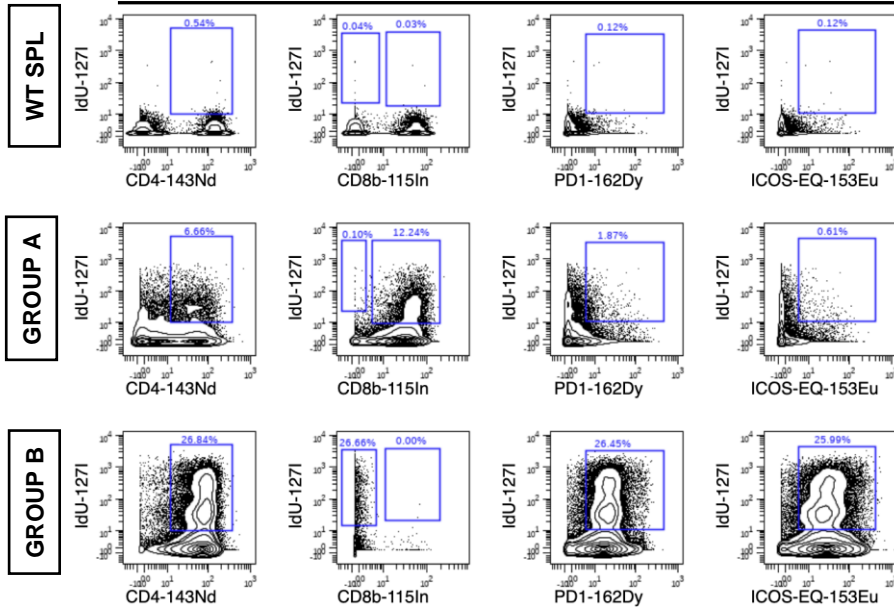



# Supplementary Figure 8

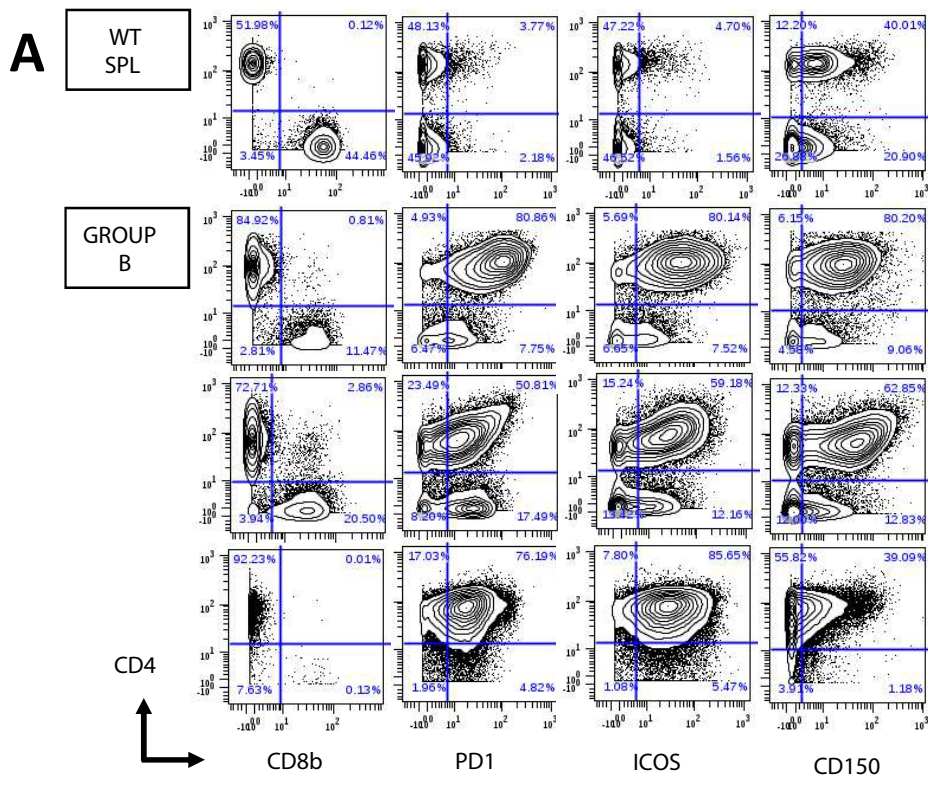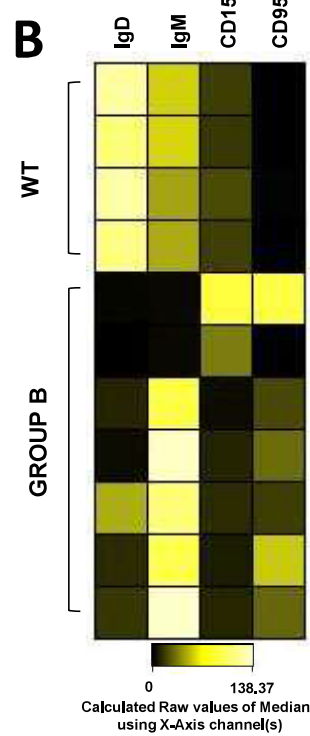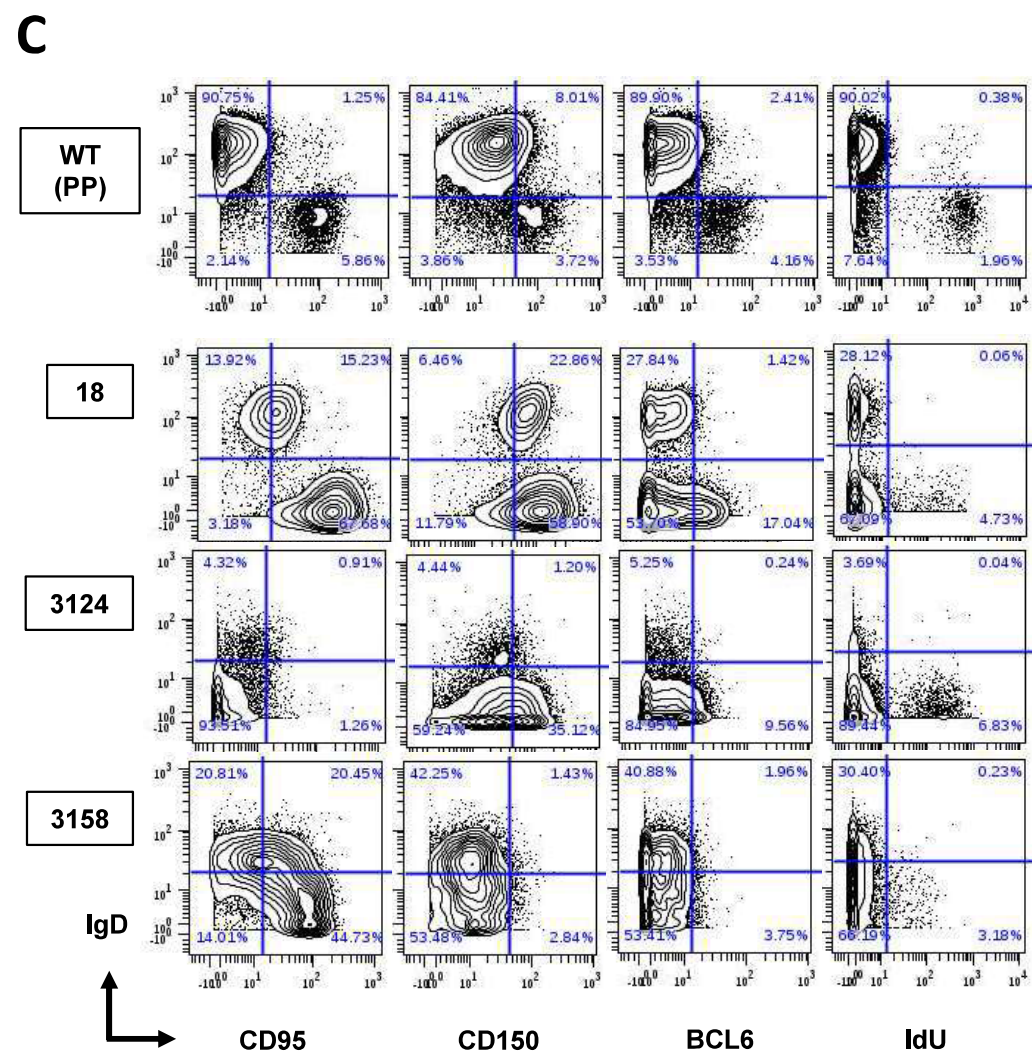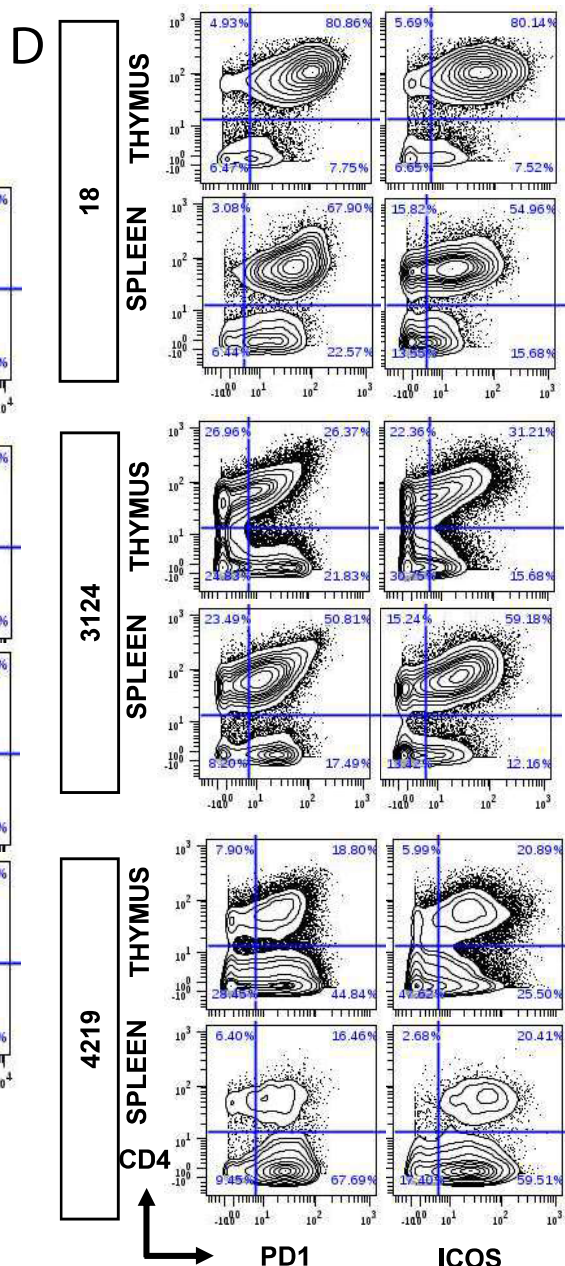

Supplement: NIHMS1630742-supplement-1.pdf [file NIHMS1630742-supplement-1.pdf]
